# Supplementary material for: A rhodol-enone dye platform with dual reaction triggers for specific detection of Cys
Source: Royal Society of Chemistry journal article supplement (doi:10.1039/c9tb02794g), 2020-01-01
Supplement: c9tb02794g1.pdf [file c9tb02794g1.pdf]

## Supplementary data for

# A rhodol-enone dye platform with dual reaction triggers for specific detection of Cys

Linan Hu<sup>a,c#</sup>, Zhu Chen<sup>a#</sup>, Cheng Yu<sup>a</sup>, Jie Zhang<sup>a</sup>, Hailiang Zhang<sup>b</sup>, Pengfei Xu<sup>b\*</sup> and Enhua Xiao<sup>a\*</sup>

<sup>a</sup>Departments of Radiology, The Second Xiangya Hospital, Central South University, Changsha, Hunan 410011, P.R. China;

<sup>b</sup>Institute of Clinical Pharmacy & Pharmacology, Jining First People's Hospital, Jining Medical University, Jining 272000, P.R. China;

<sup>c</sup>Departments of Radiology, Zhuzhou Central Hospital, Zhuzhou, Hunan 412000, P.R. China

## Table of Contents

1. <sup>1</sup>H NMR spectroscopy of compound of BL.
2. <sup>13</sup>C NMR spectroscopy of BL.
3. <sup>1</sup>H NMR spectroscopy of compound of probe BL-C.
4. <sup>13</sup>C NMR spectroscopy of probe BL-C
5. MS spectroscopy of BL.
6. MS spectroscopy of probe BL-C.
7. MS spectroscopy of probe BL-C after the treatment with Cys.
8. MS spectroscopy of the lactam.
9. Fluorescence spectra of BL in the absence and presence of Cys
10. UV/Vis absorption responses of probe BL-C toward different concentrations of Cys.
11. Fluorescence intensity at 560 nm of probe BL-C versus Cys concentration
12. The time-dependent fluorescence change

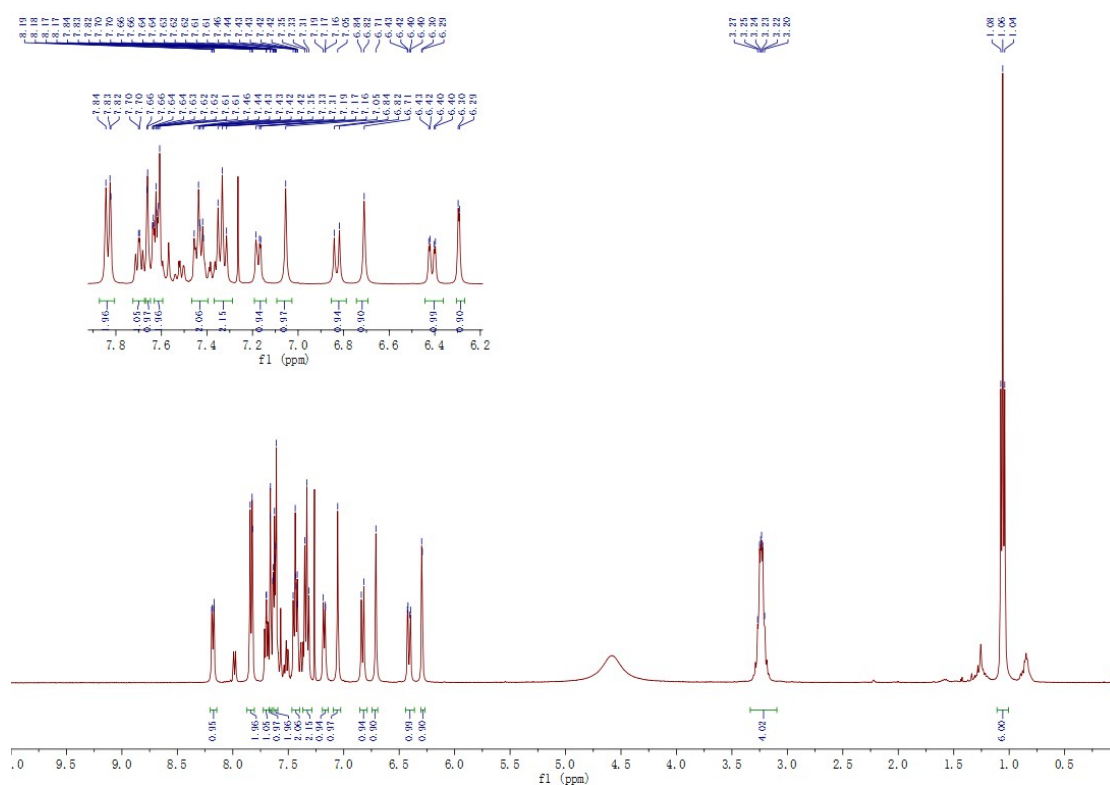

Figure S1.  $^1\text{H}$  NMR spectroscopy of compound of BL.

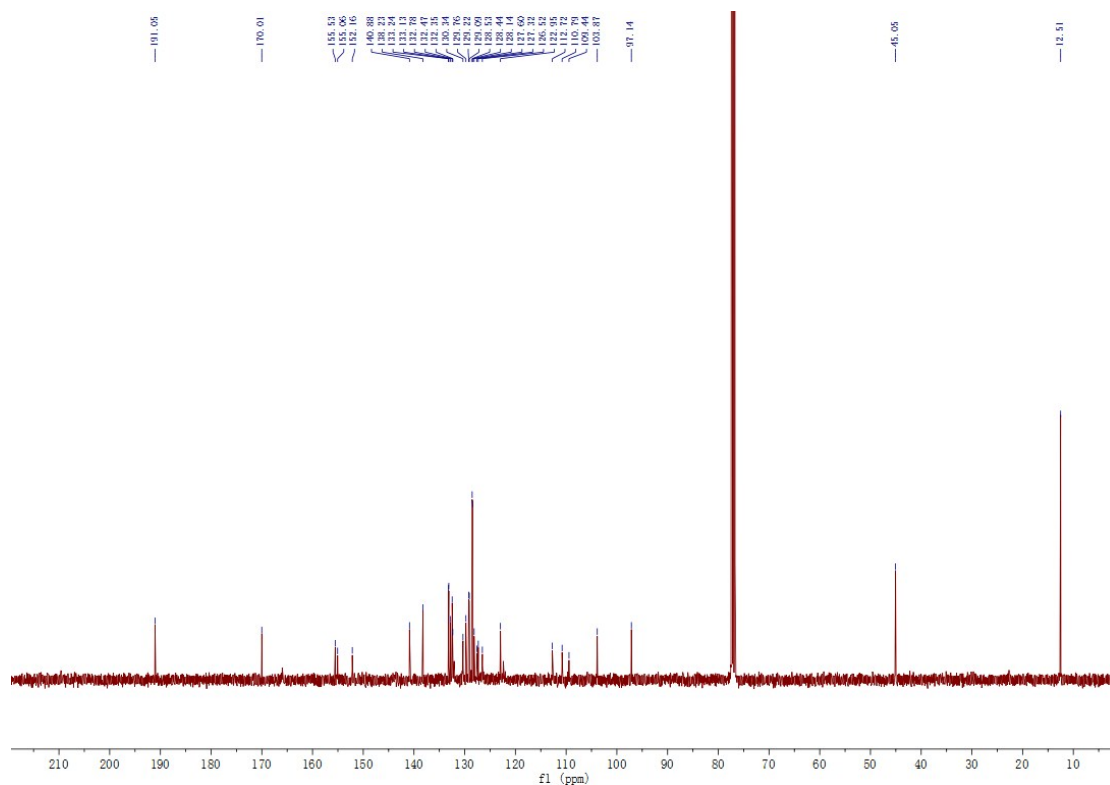

Figure S2.  $^{13}\text{C}$  NMR spectroscopy of compound of BL.

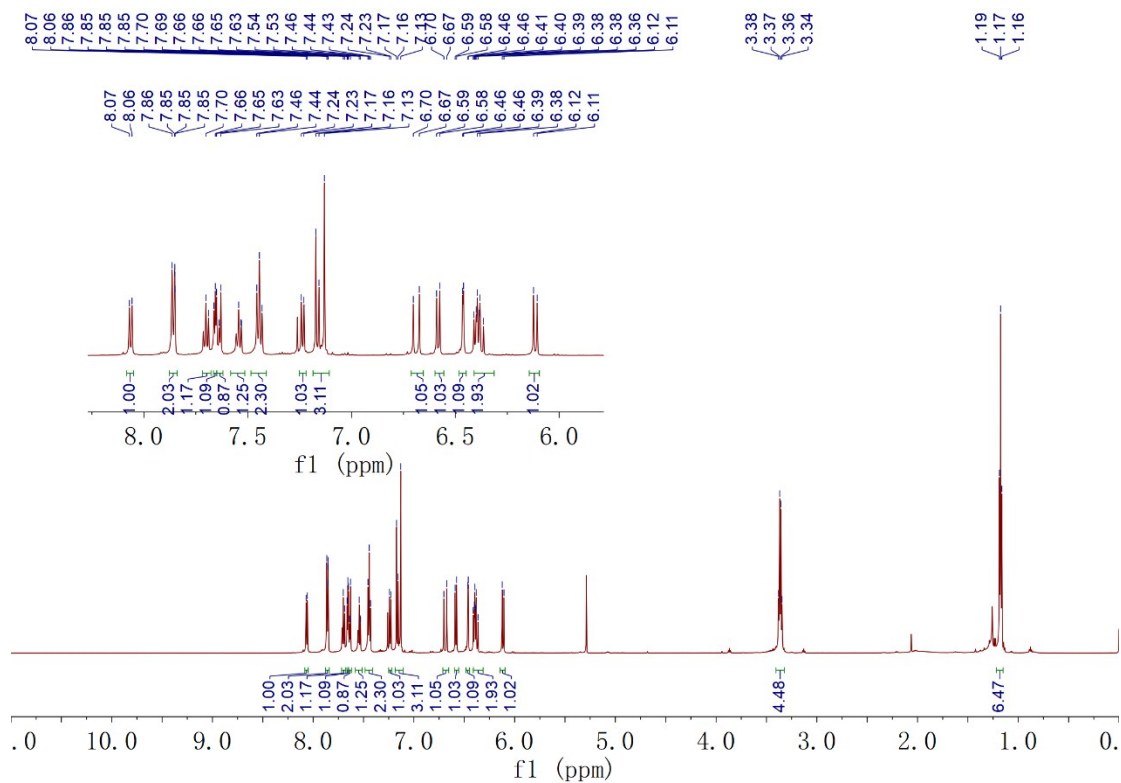

**Figure S3.**  $^1\text{H}$  NMR spectroscopy of compound of probe **BL-C**.

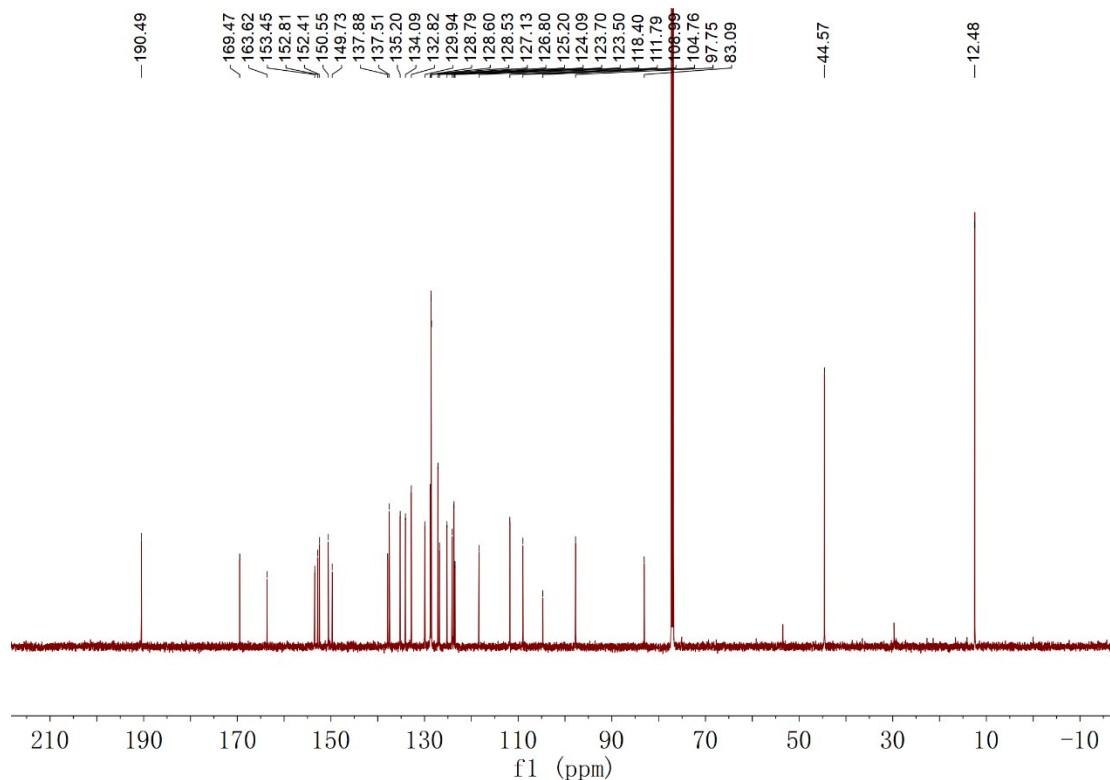

**Figure S4.**  $^{13}\text{C}$  NMR spectroscopy of compound of probe **BL-C**.

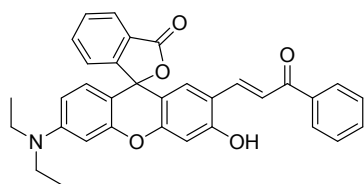

Exact Mass: 517.18892

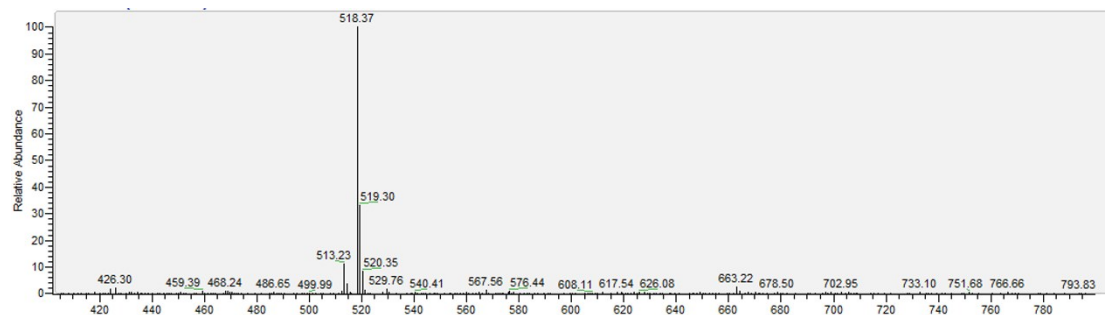

Figure S5. MS spectroscopy of BL (M+H)<sup>+</sup>.

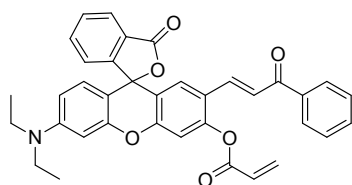

Exact Mass: 571.19949

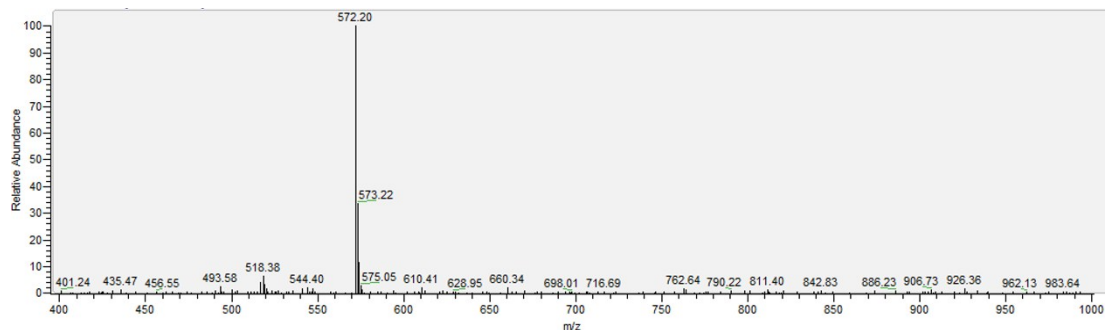

Figure S6. MS spectroscopy of probe BL-C (M+H)<sup>+</sup>.

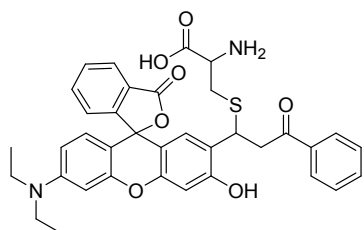

Exact Mass: 638.20867

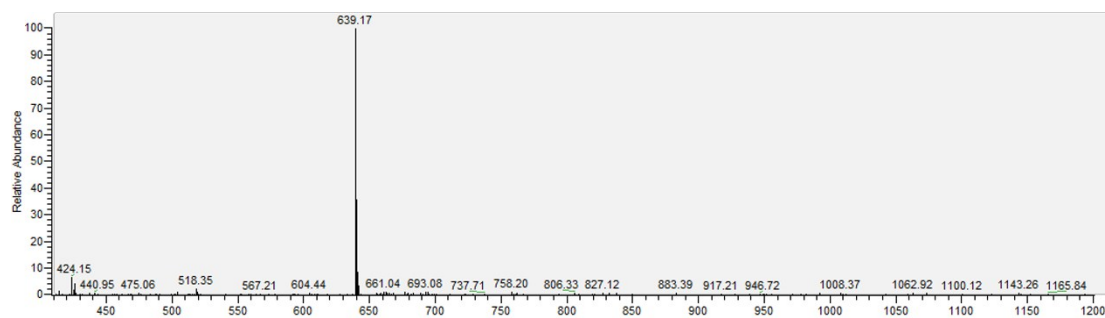

**Figure S7.** MS spectroscopy of probe **BL-C** after the treatment with Cys ( $M+H$ )<sup>+</sup>.

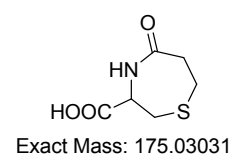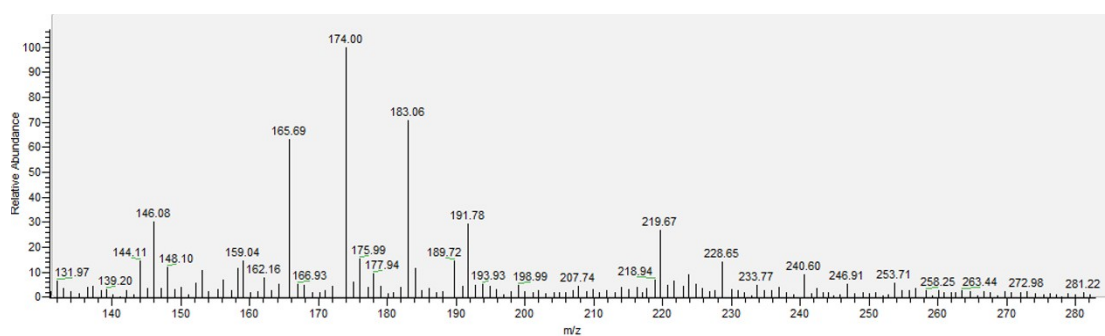

**Figure S8.** MS spectroscopy of the lactam produced by the reaction of probe **BL-C** with Cys ( $M-H$ ).

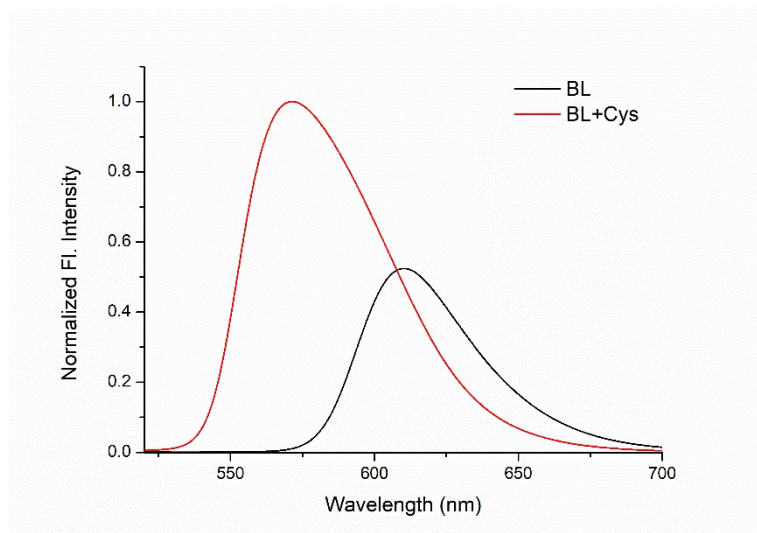

**Figure S9.** Fluorescence spectra of **BL** (10  $\mu$ M) in the absence and presence of Cys (100  $\mu$ M).

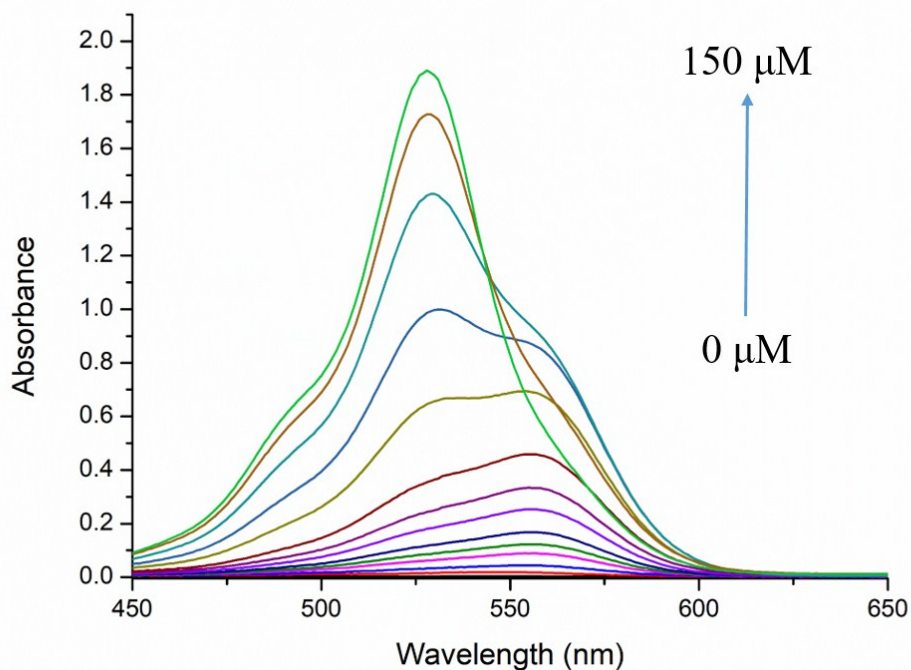

**Figure 10.** UV/Vis absorption responses of probe **BL-C** (10  $\mu\text{M}$ ) toward different concentrations of Cys (0-150  $\mu\text{M}$ ).

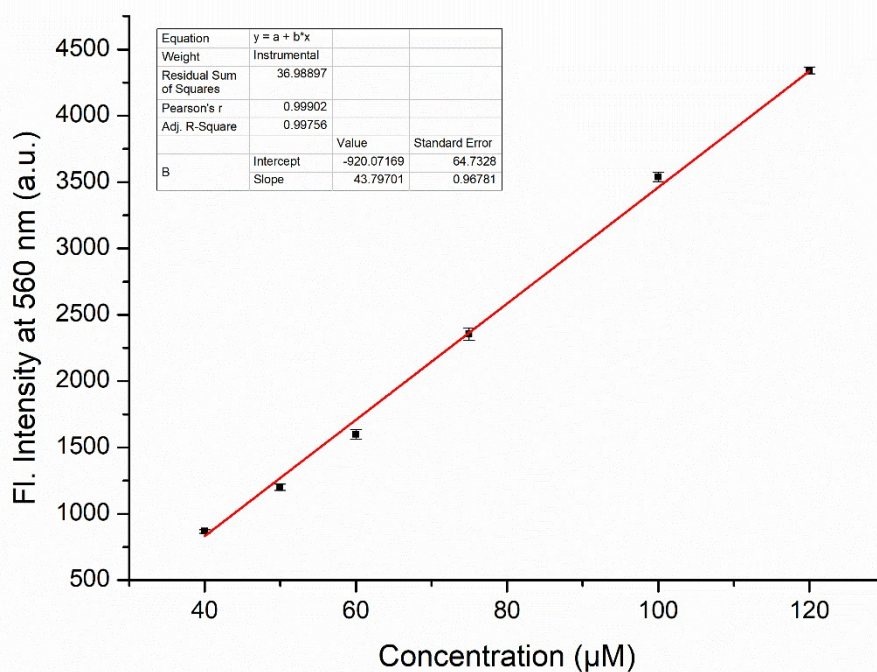

**Figure S11.** Fluorescence intensity at 560 nm of probe **BL-C** versus Cys concentration (40-120  $\mu\text{M}$ ) with  $\lambda_{\text{ex}}=480$  nm. Error bars, SD ( $n = 3$ ).

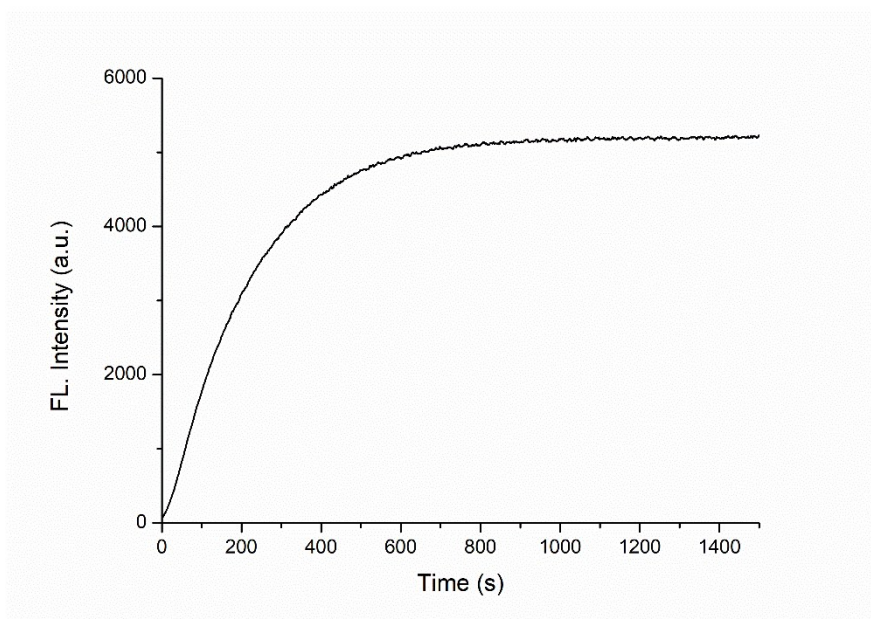

**Figure S12.** The time-dependent changes of the fluorescence intensity at 560 nm in the presence of 150  $\mu\text{M}$  Cys
